# Supplementary material for: Discovery and characterization of the evolution, variation and functions of diversity-generating retroelements using thousands of genomes and metagenomes
Source: PubMed Central journal article supplement (PMC6642488; doi:10.1186/s12864-019-5951-3), 2019-07-19

DGR cassette

Group

Count

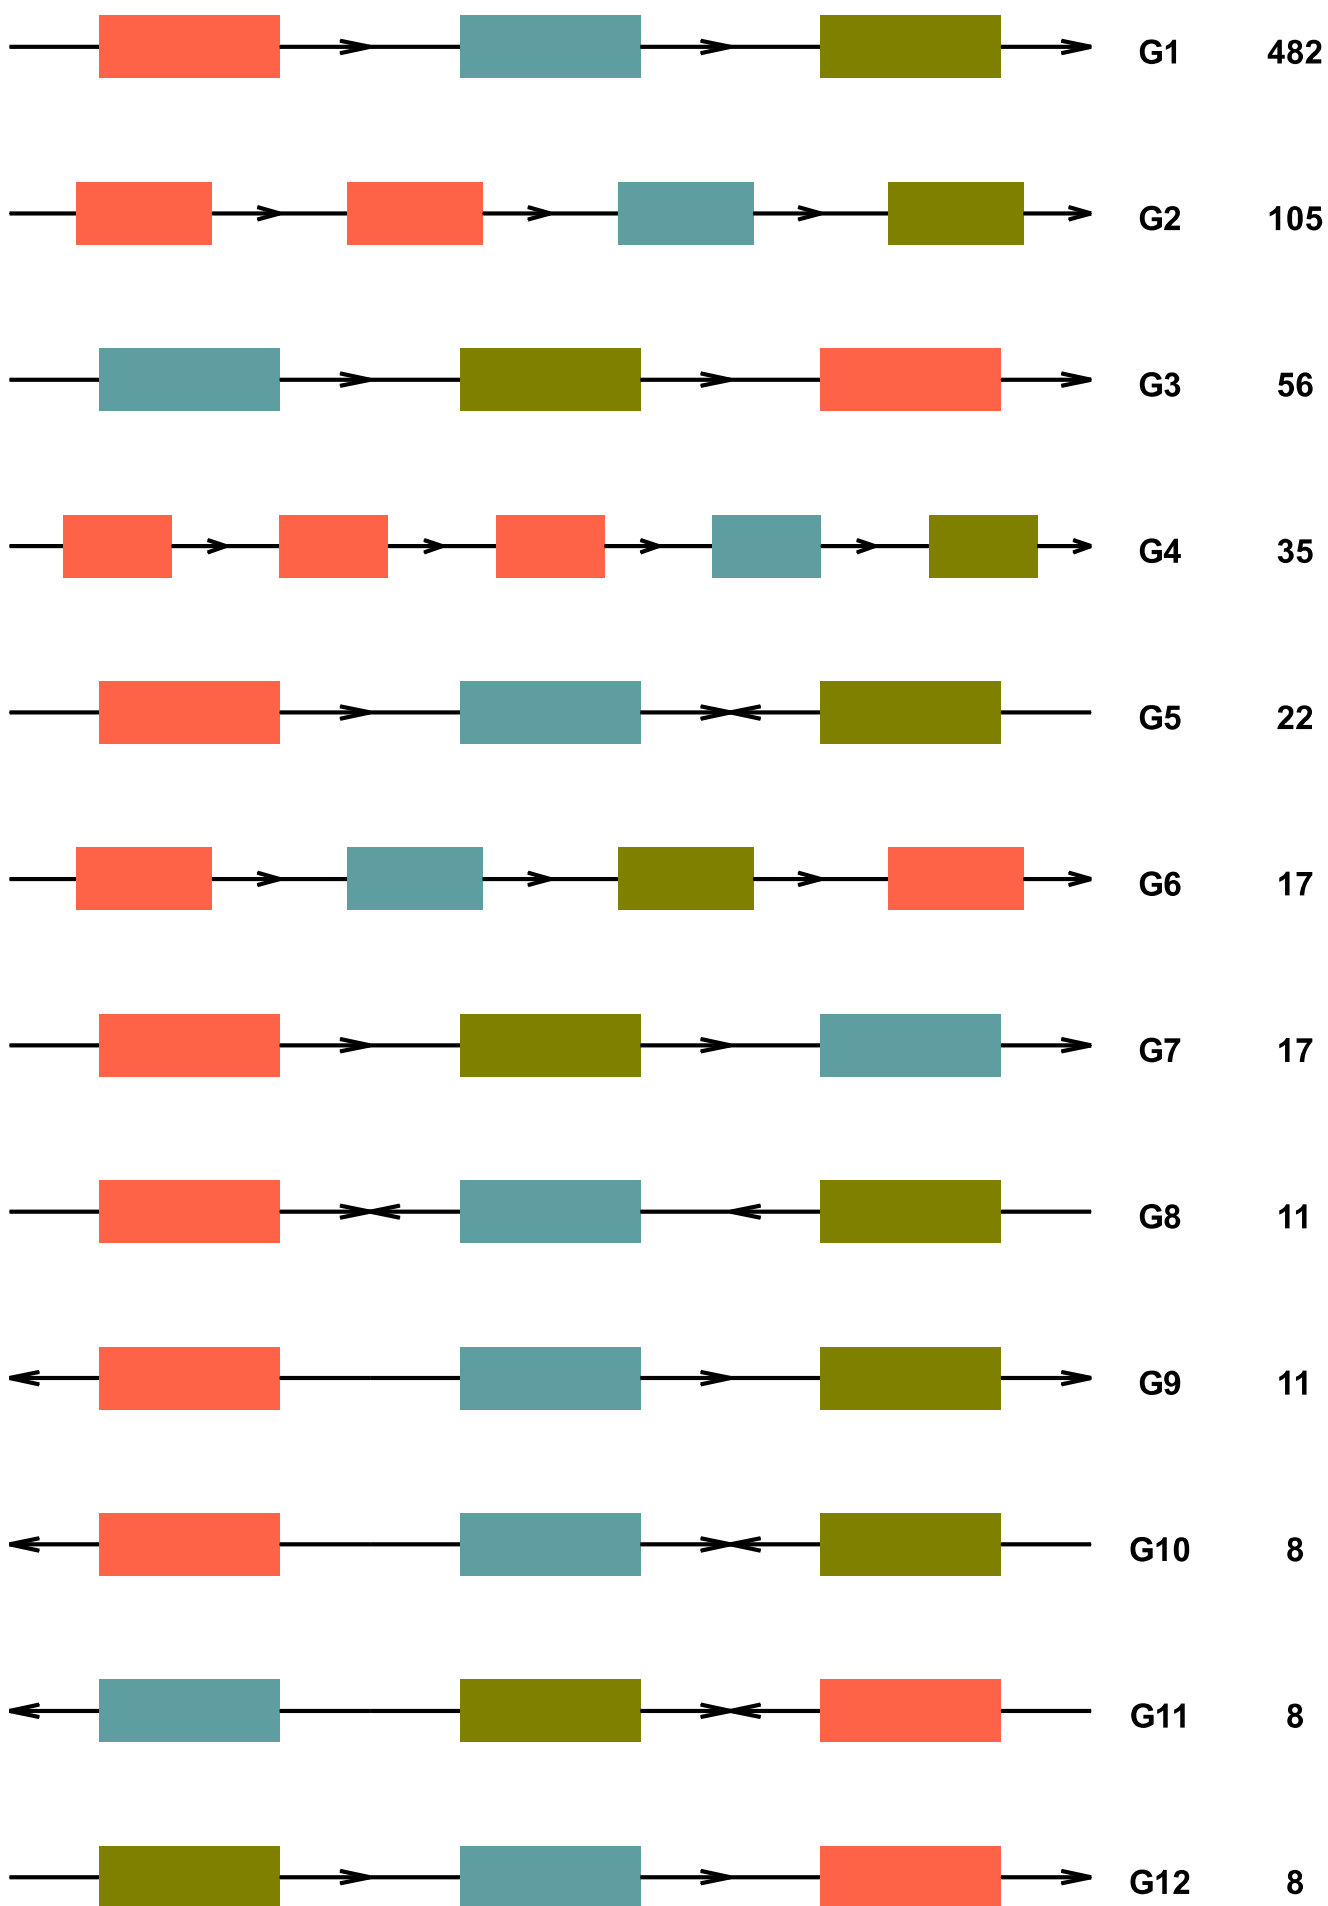

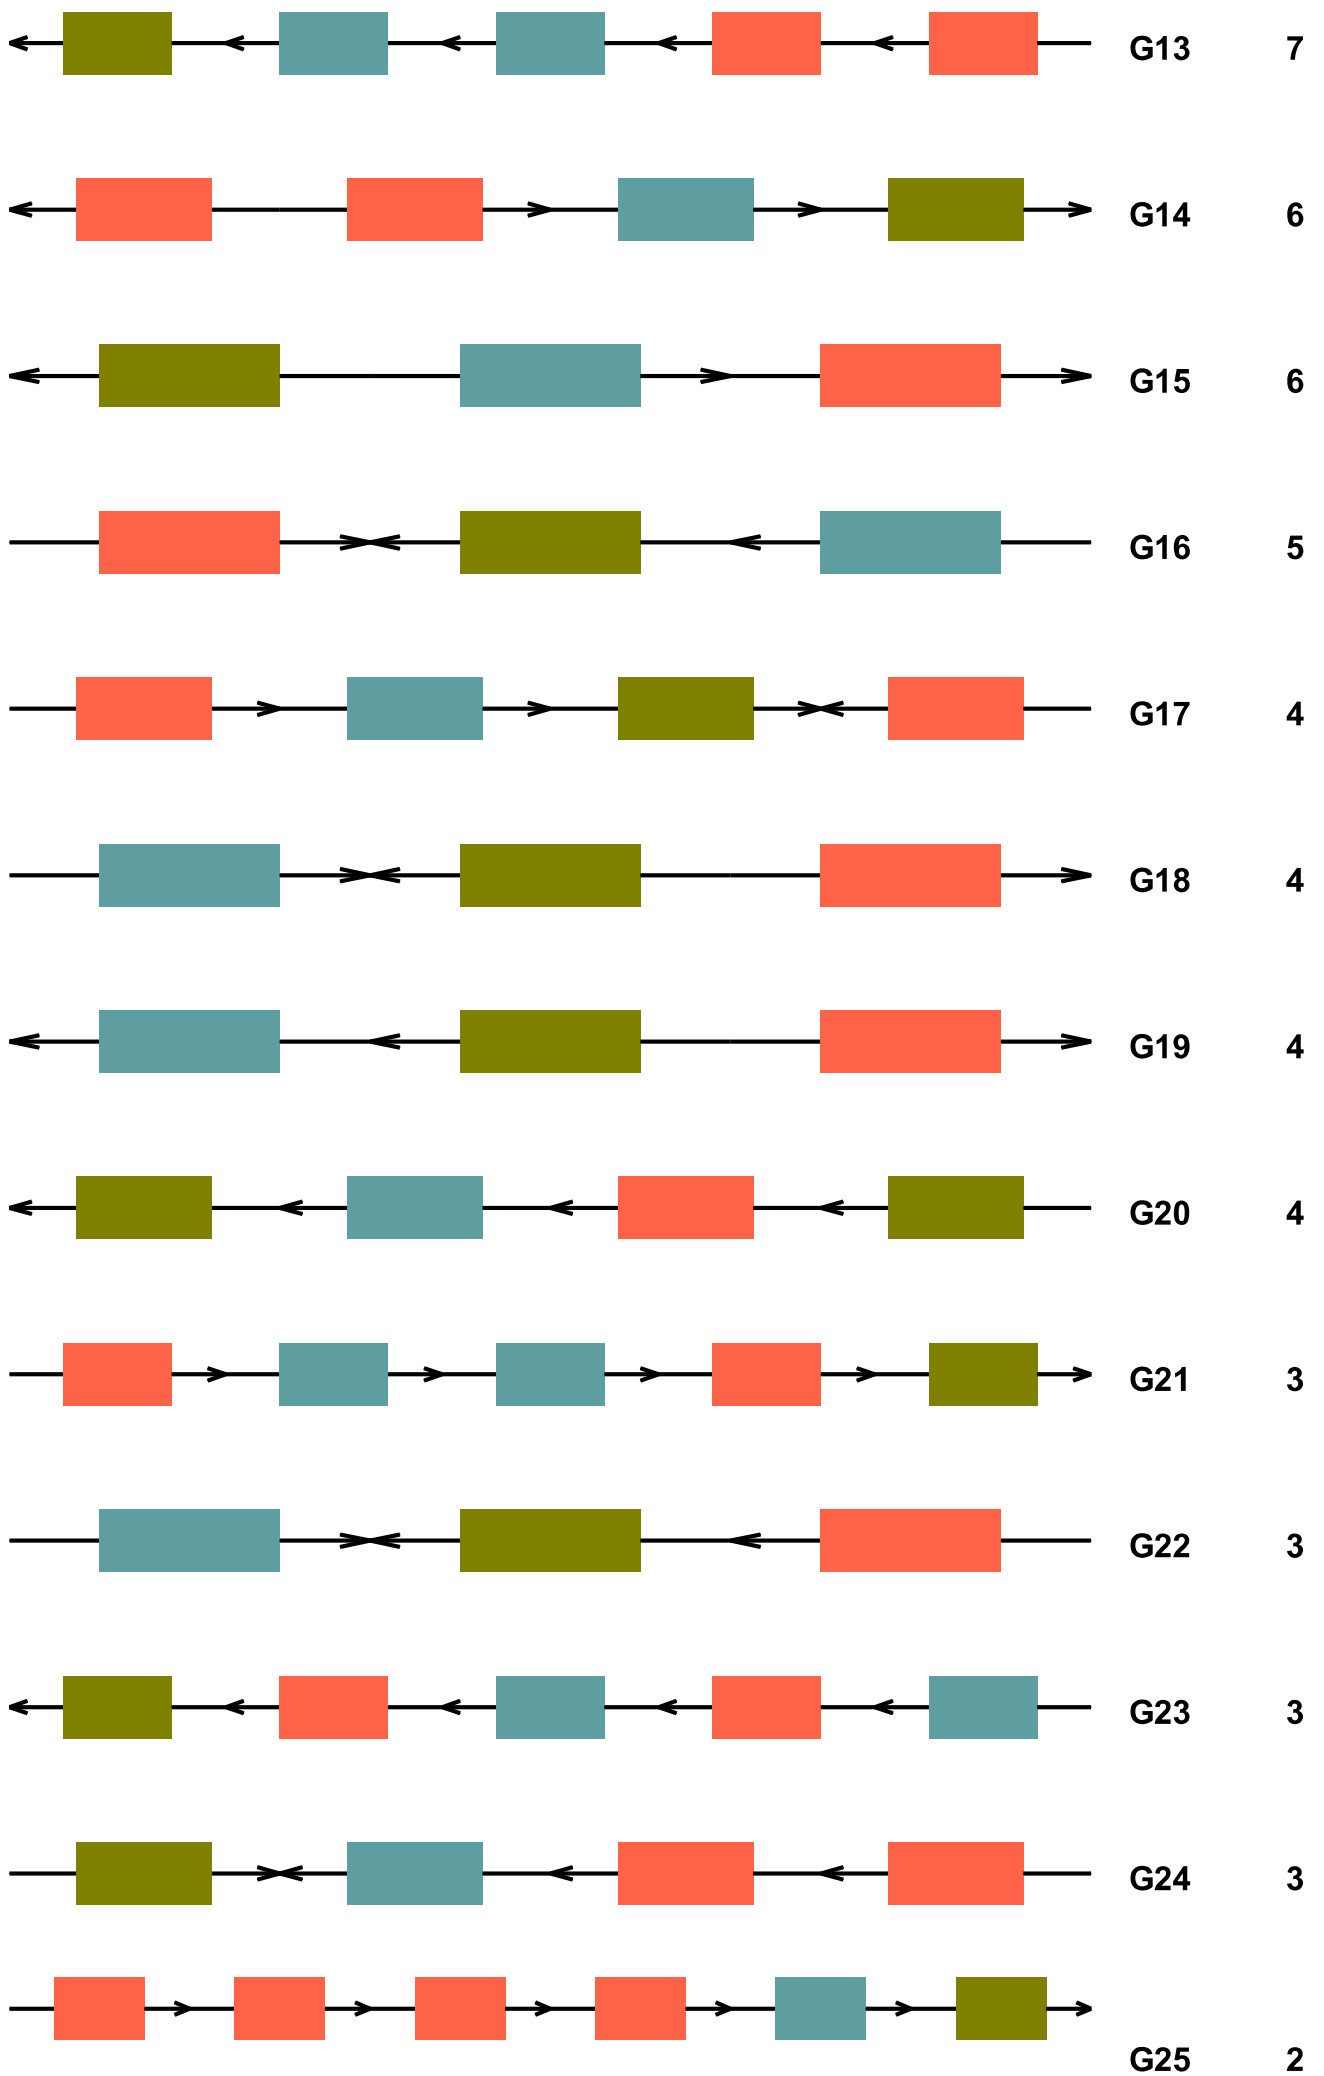

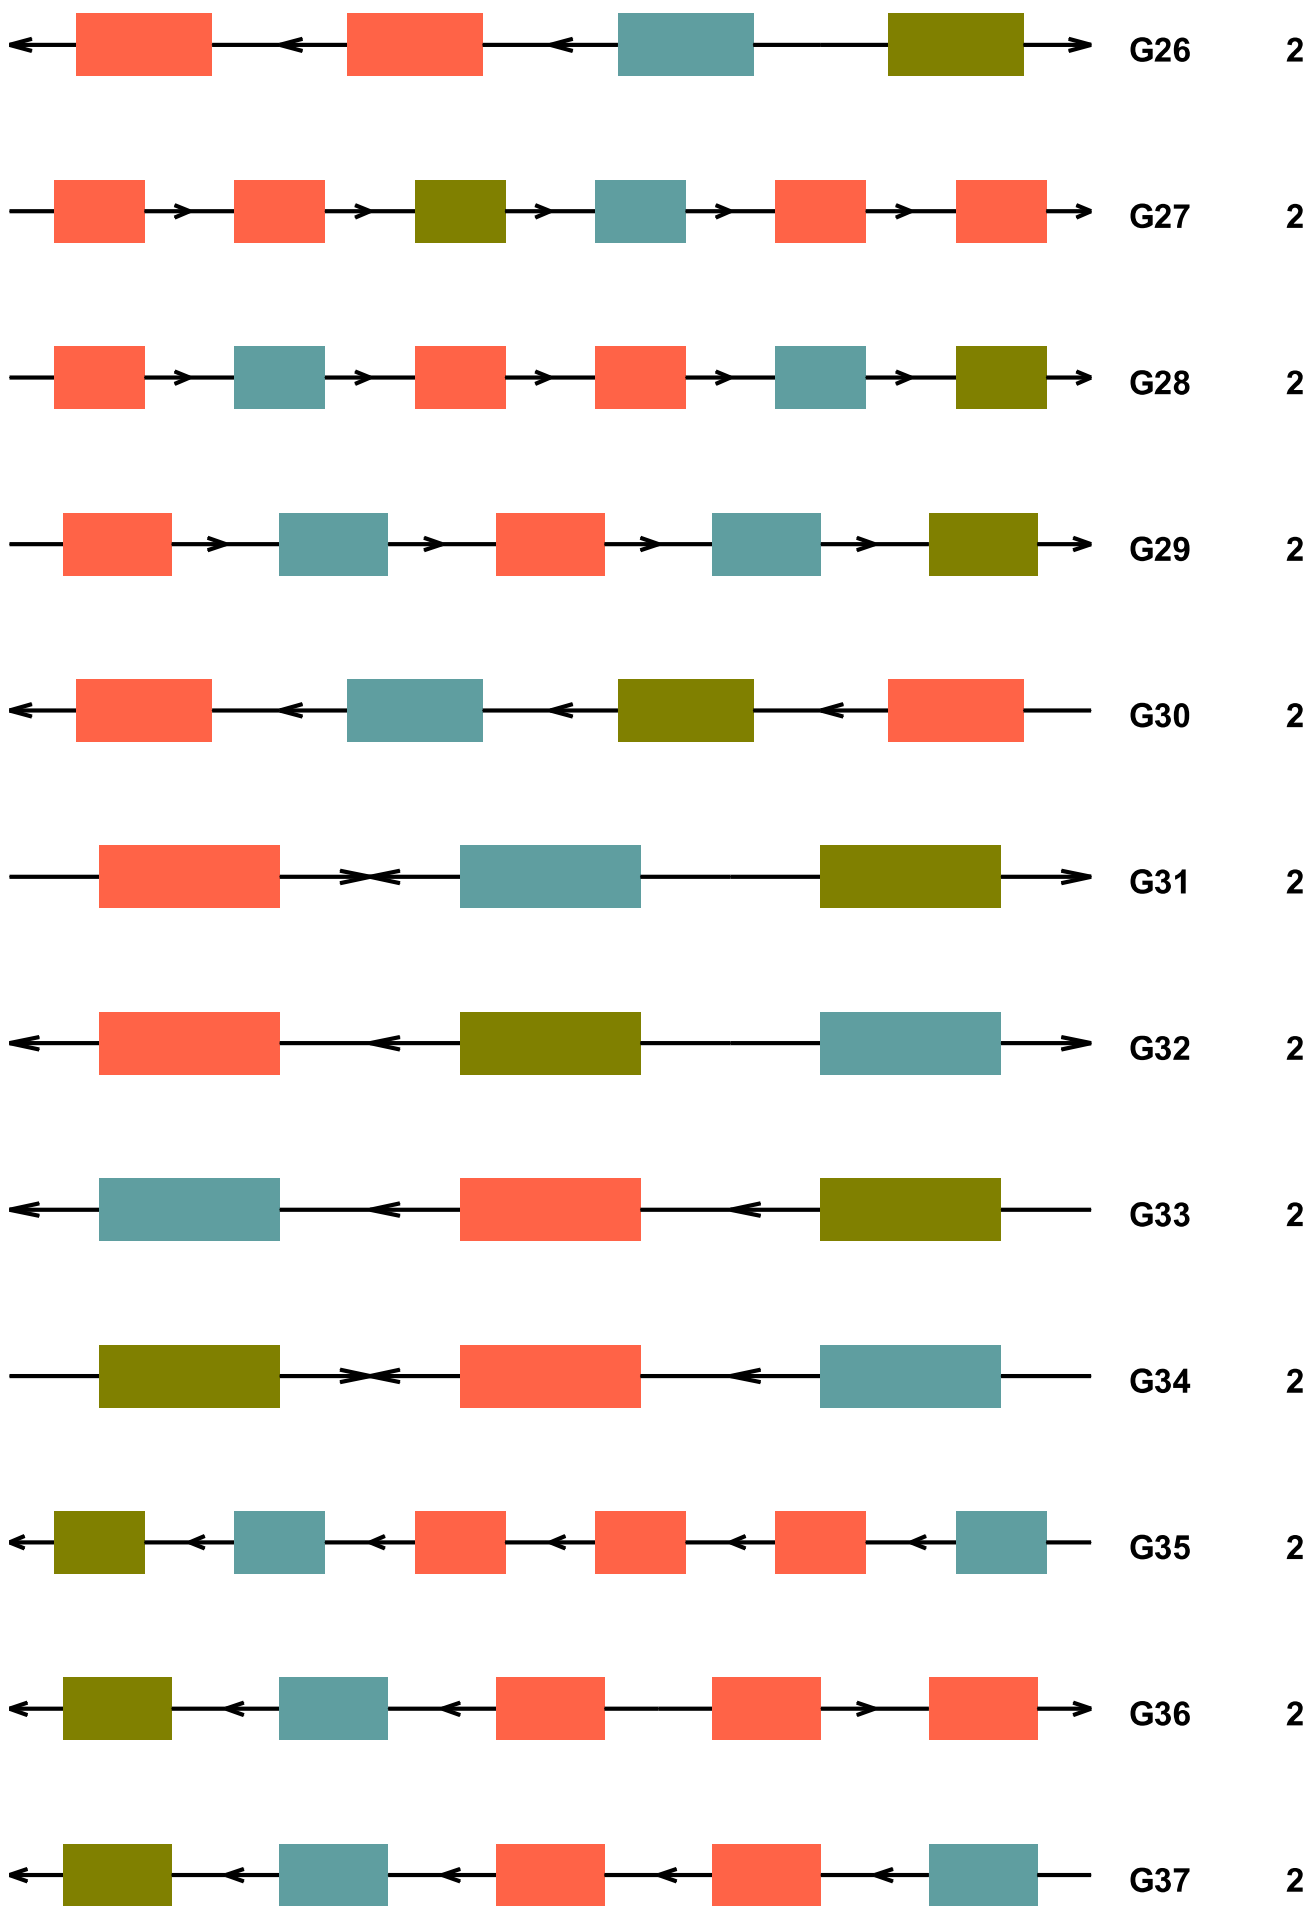

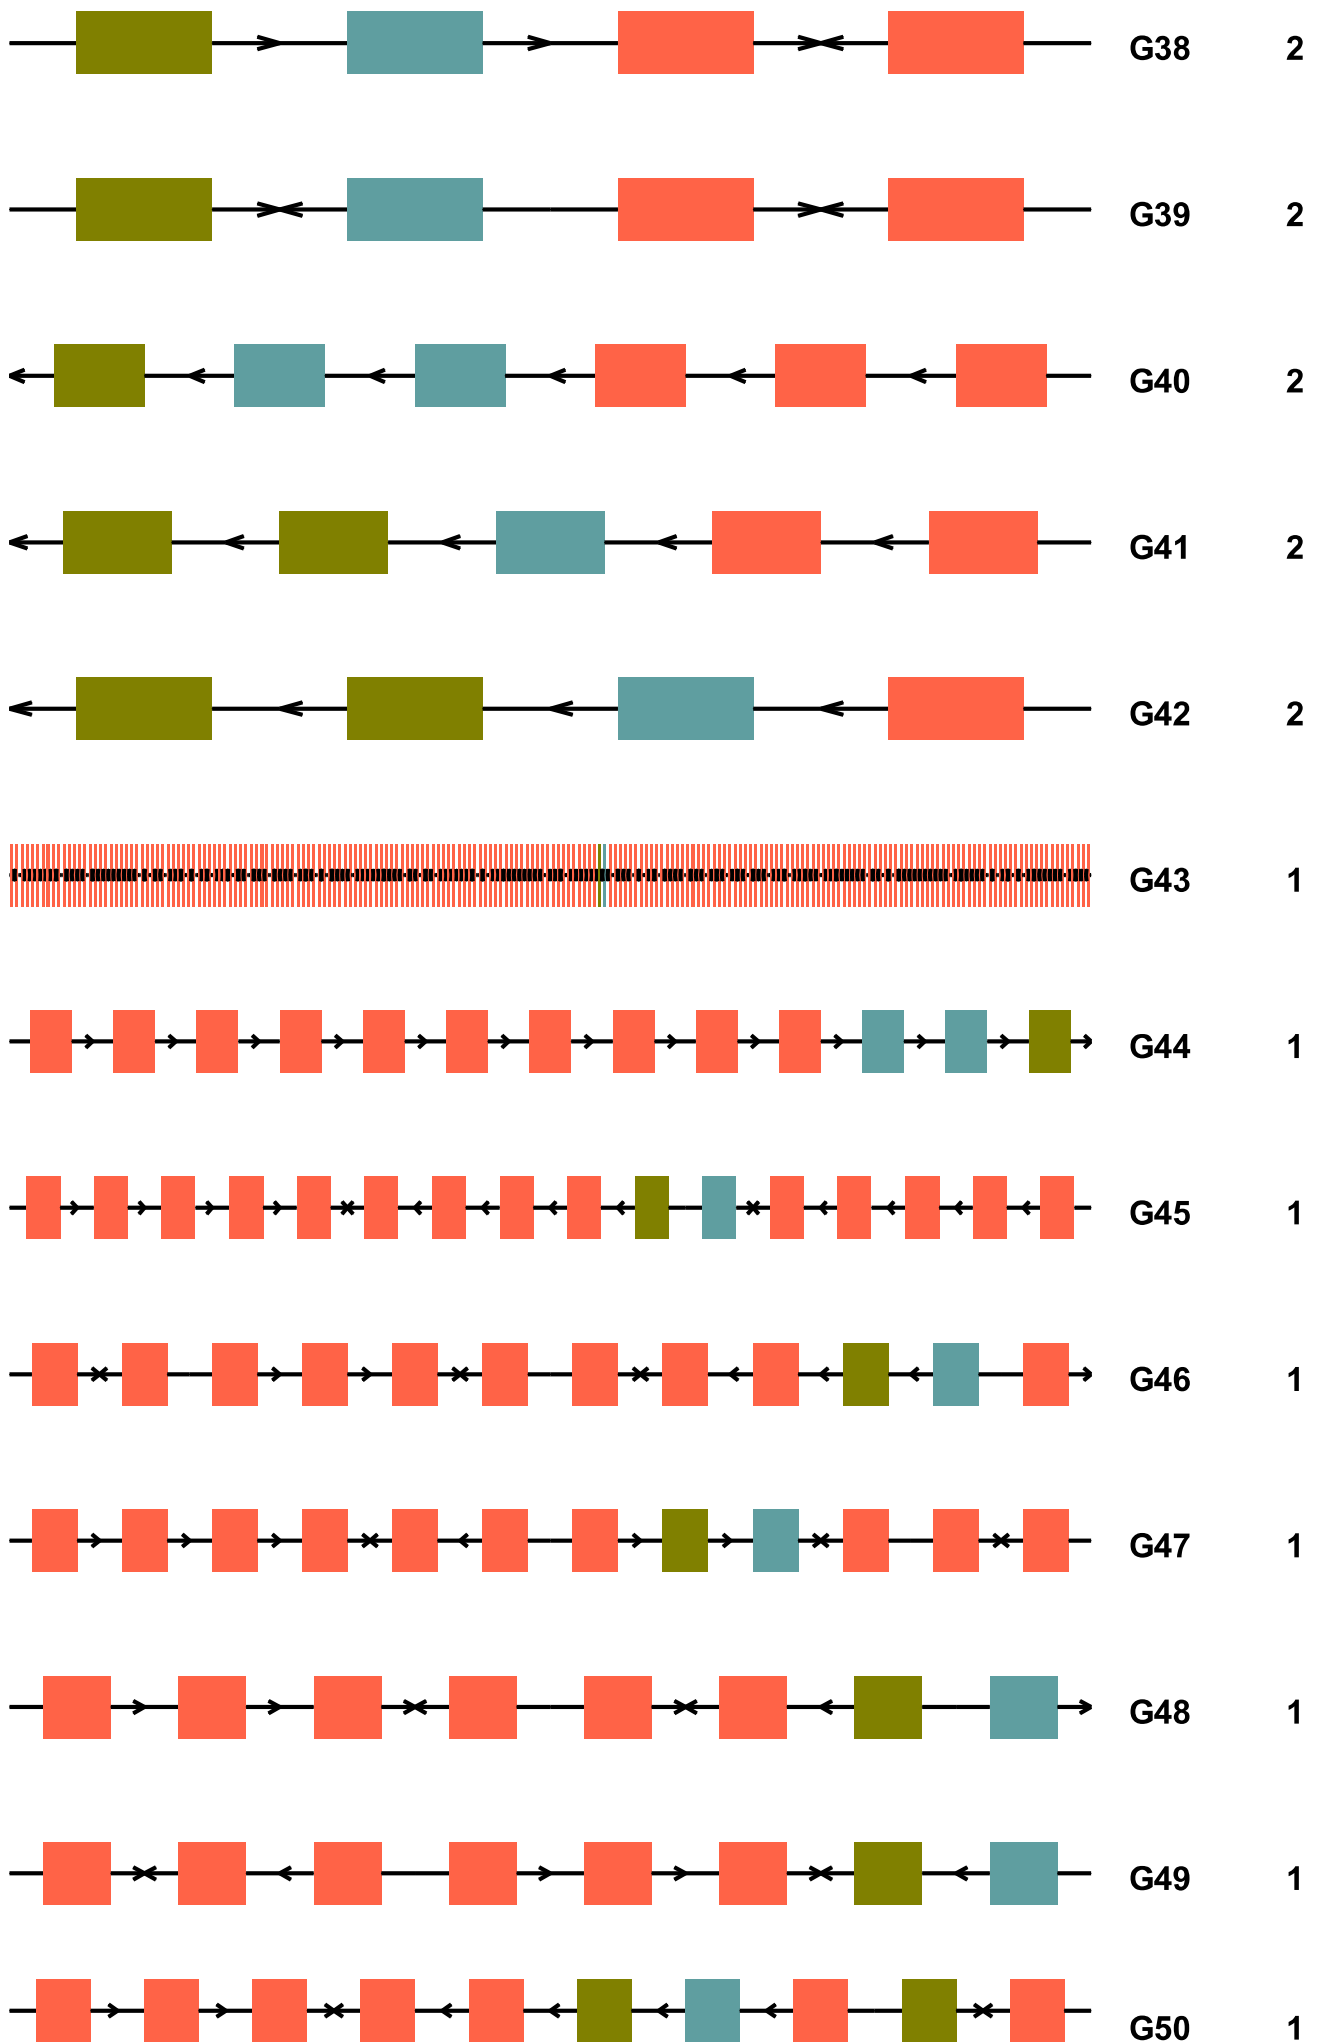

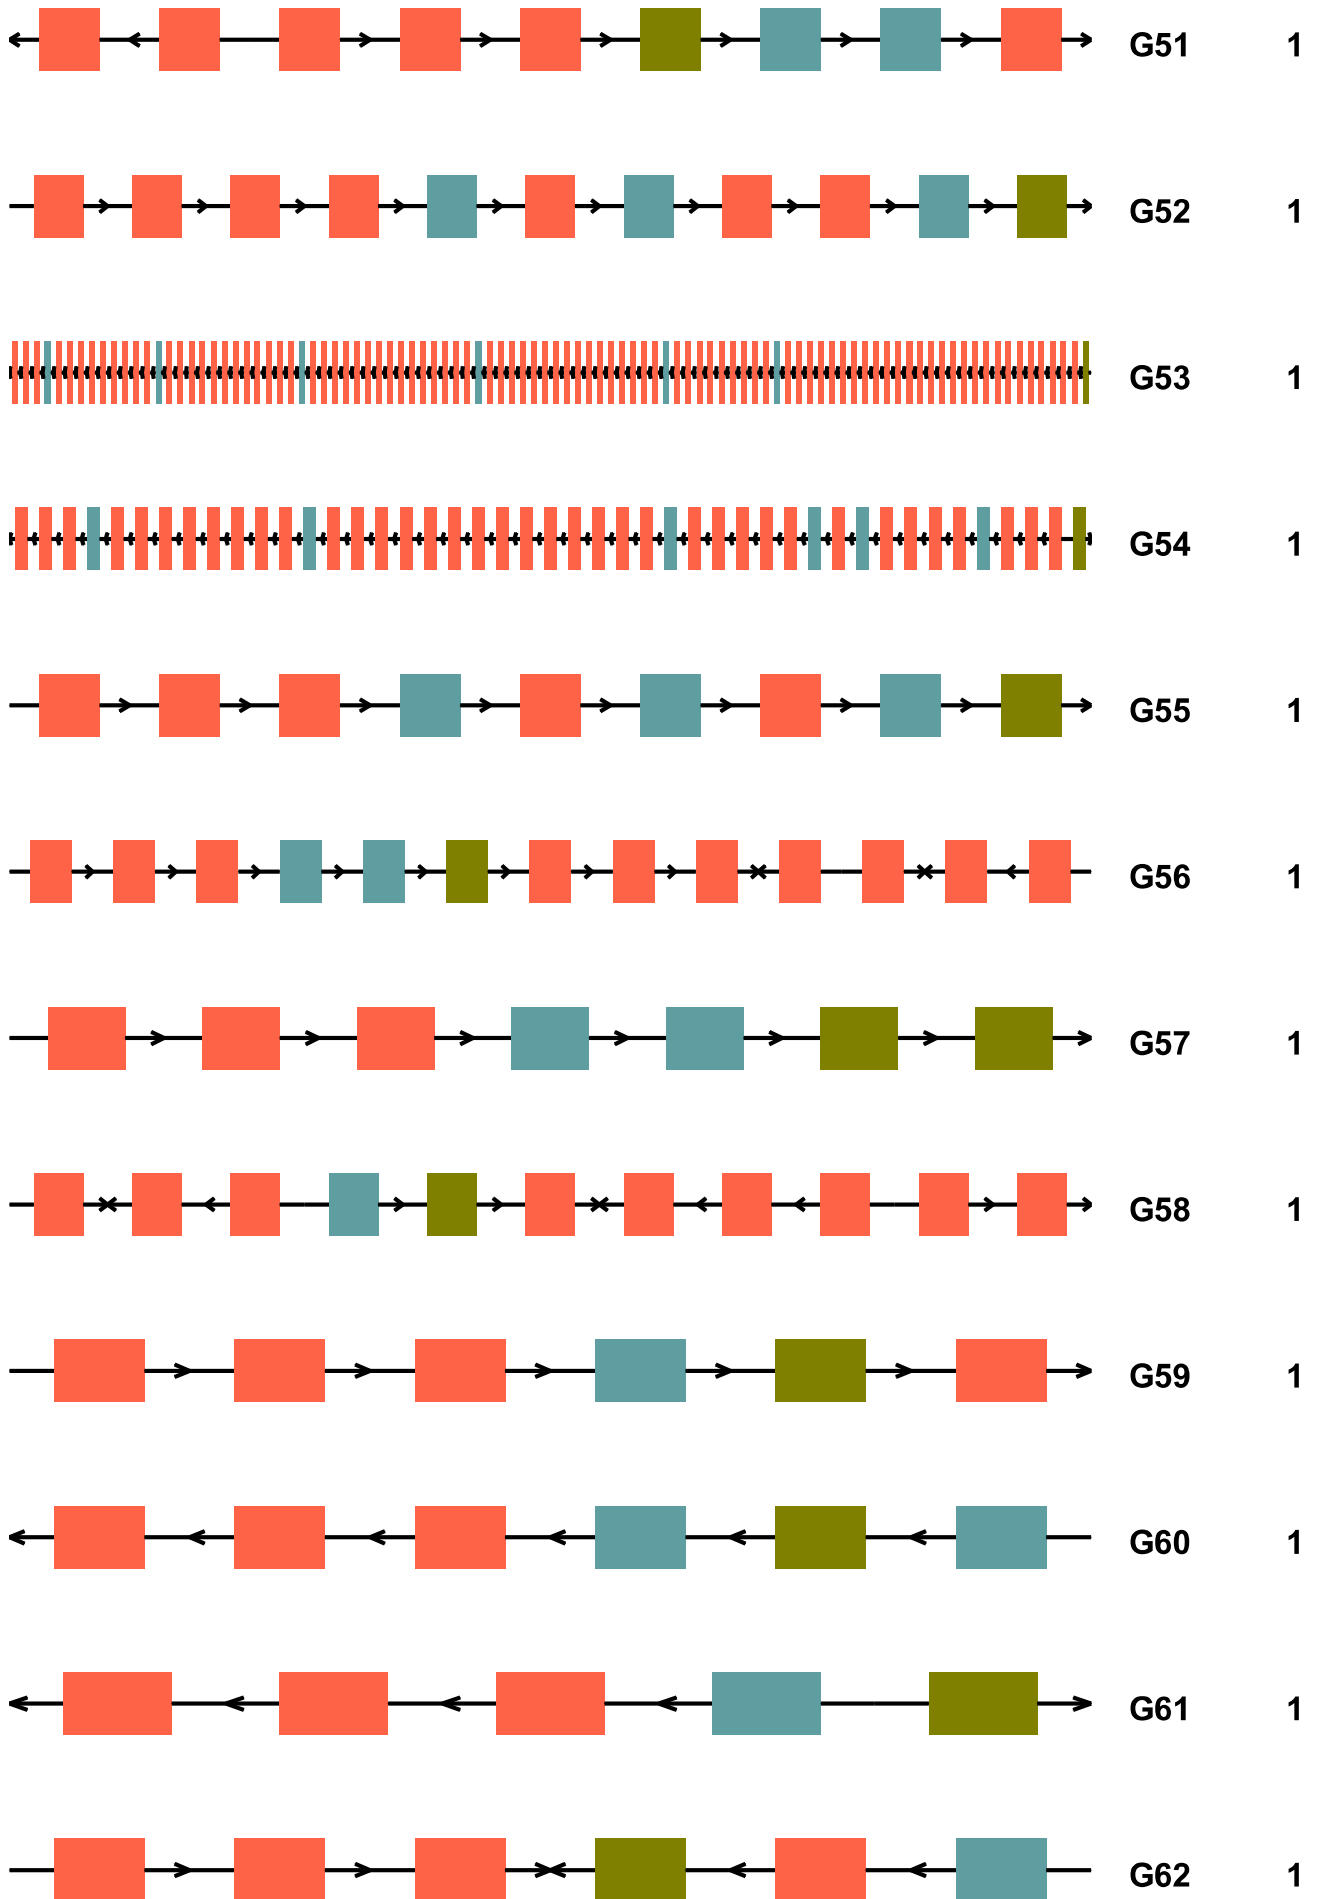

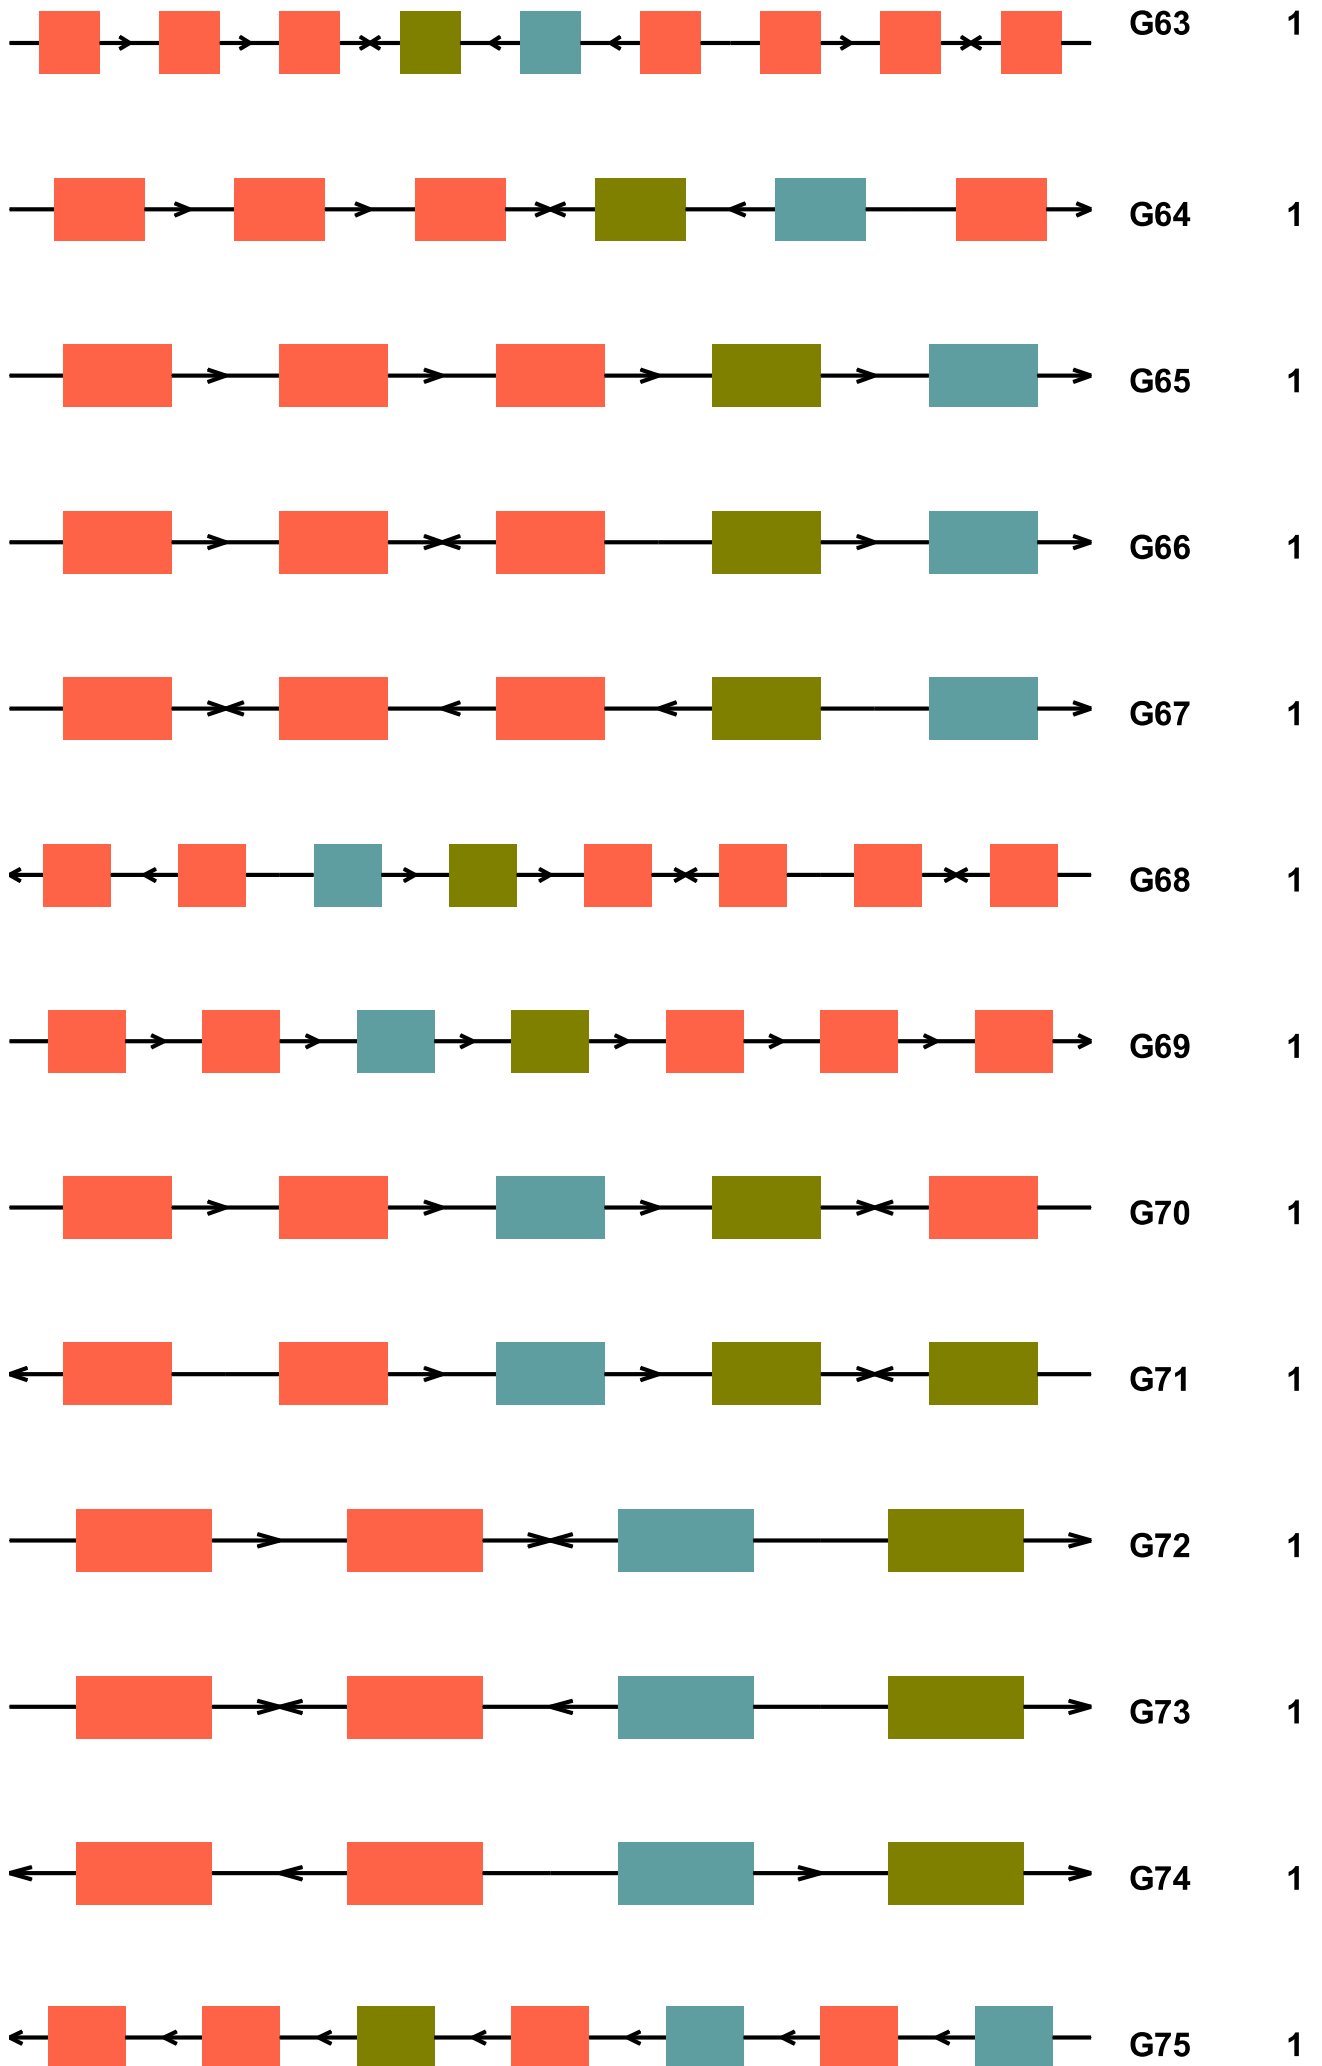

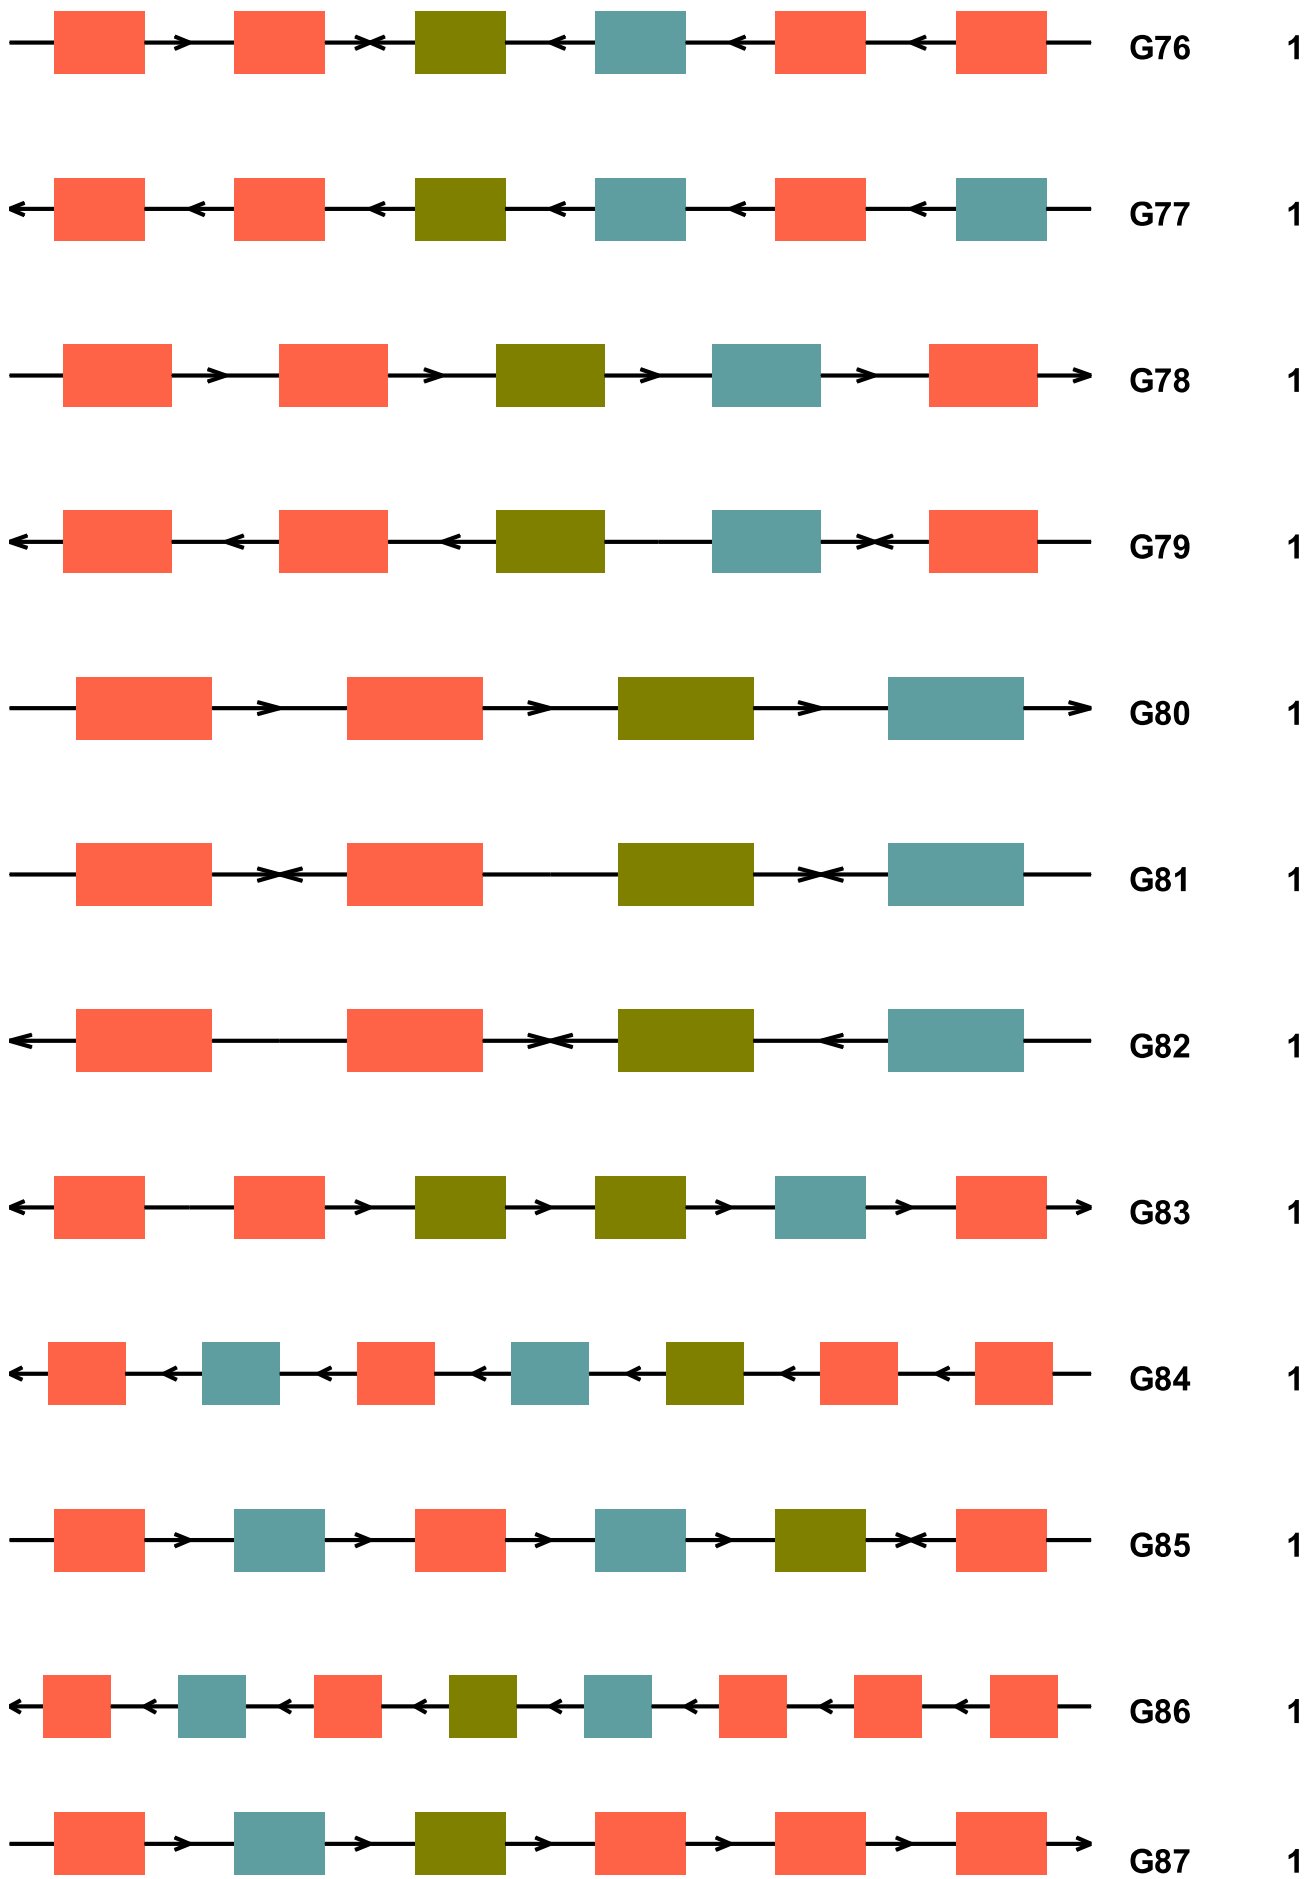

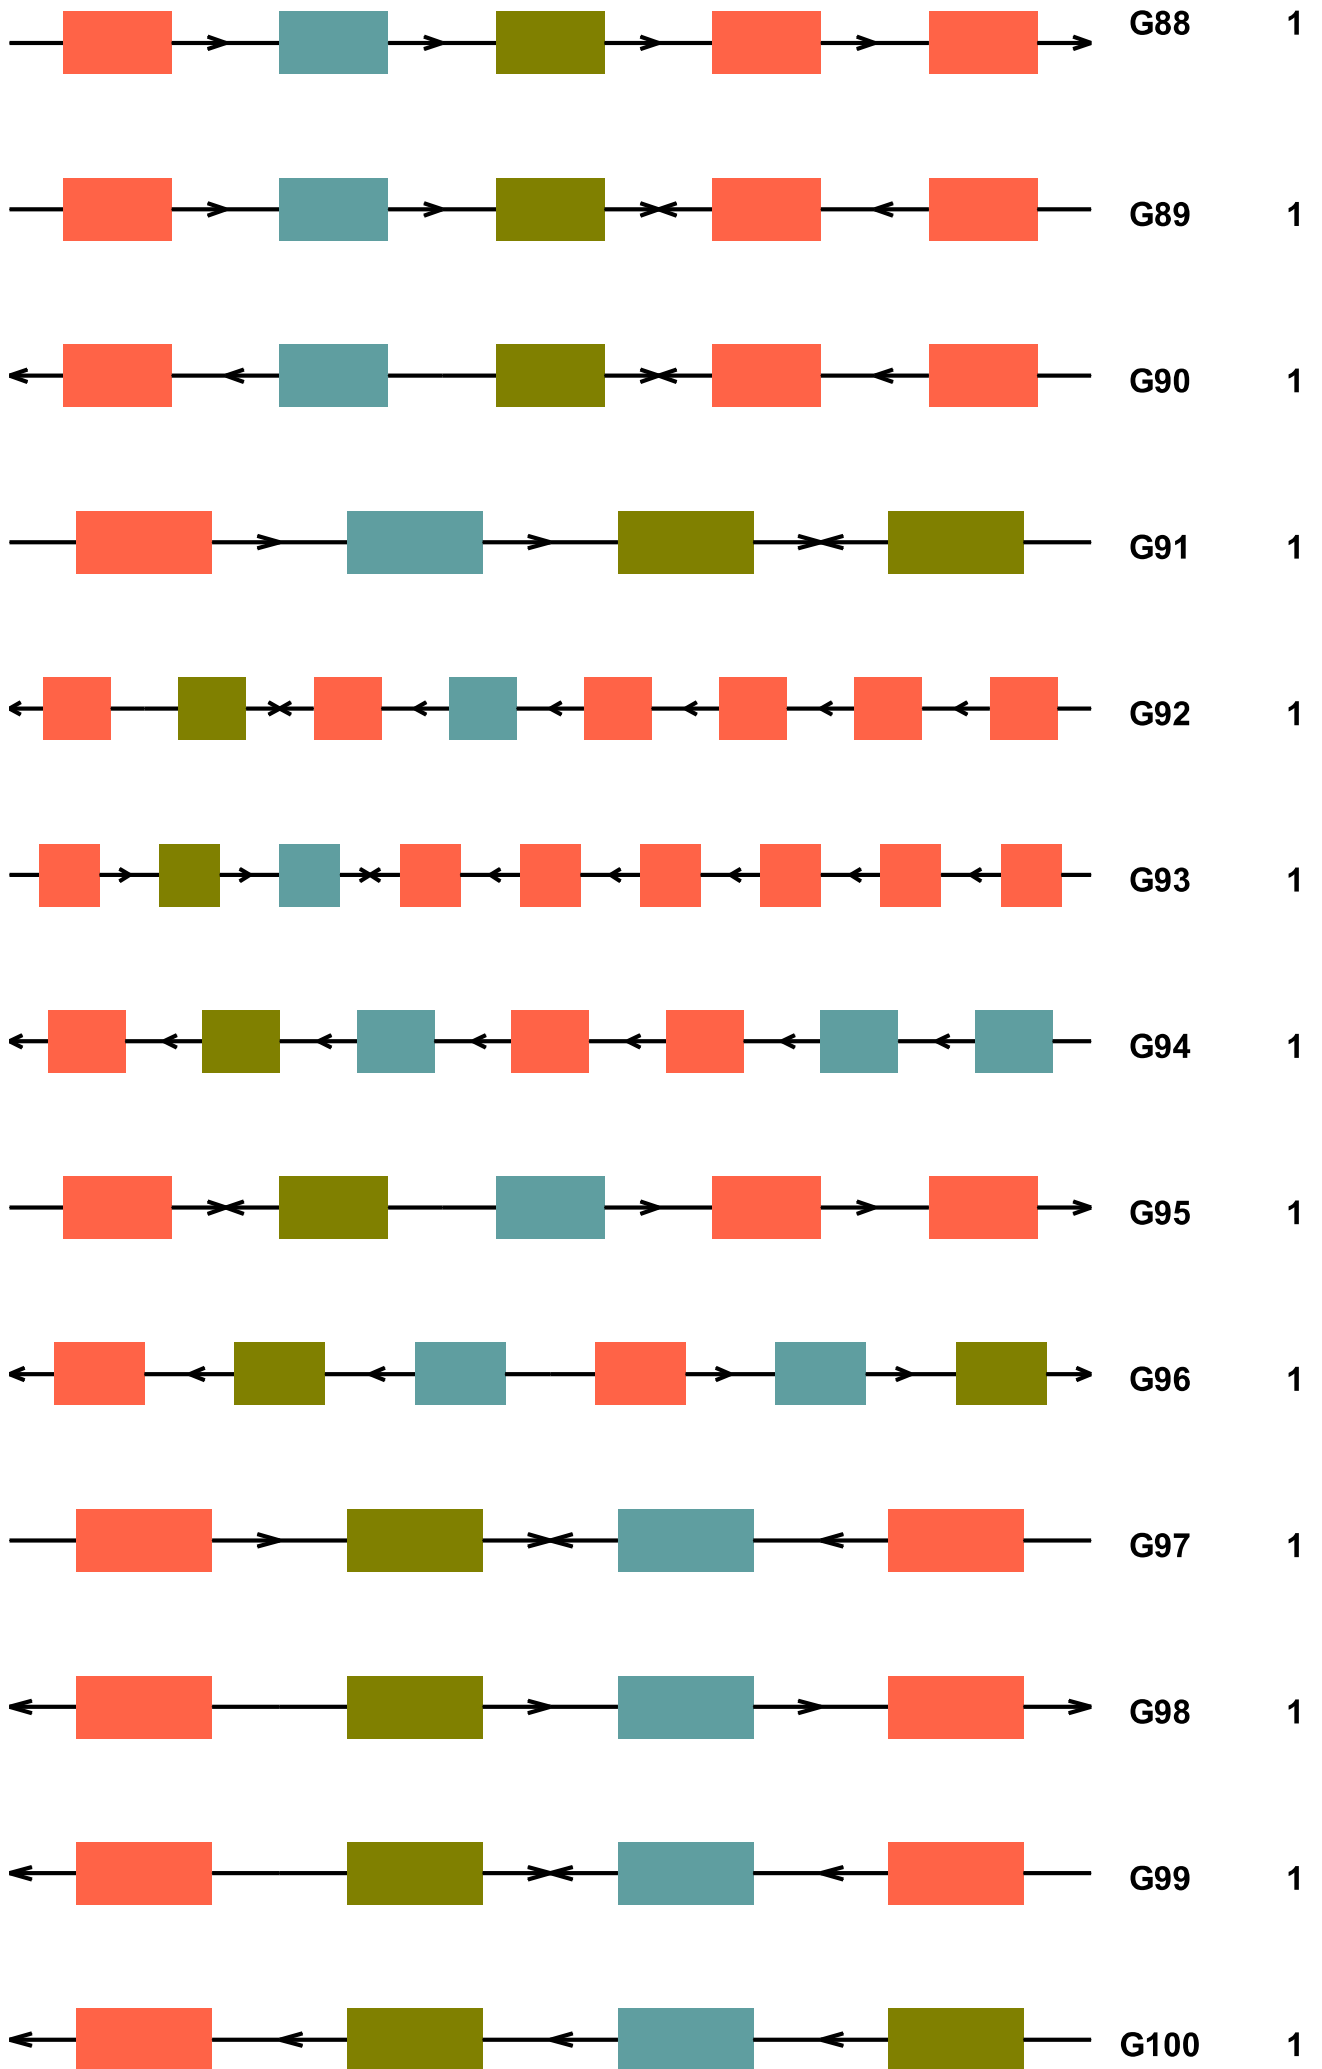



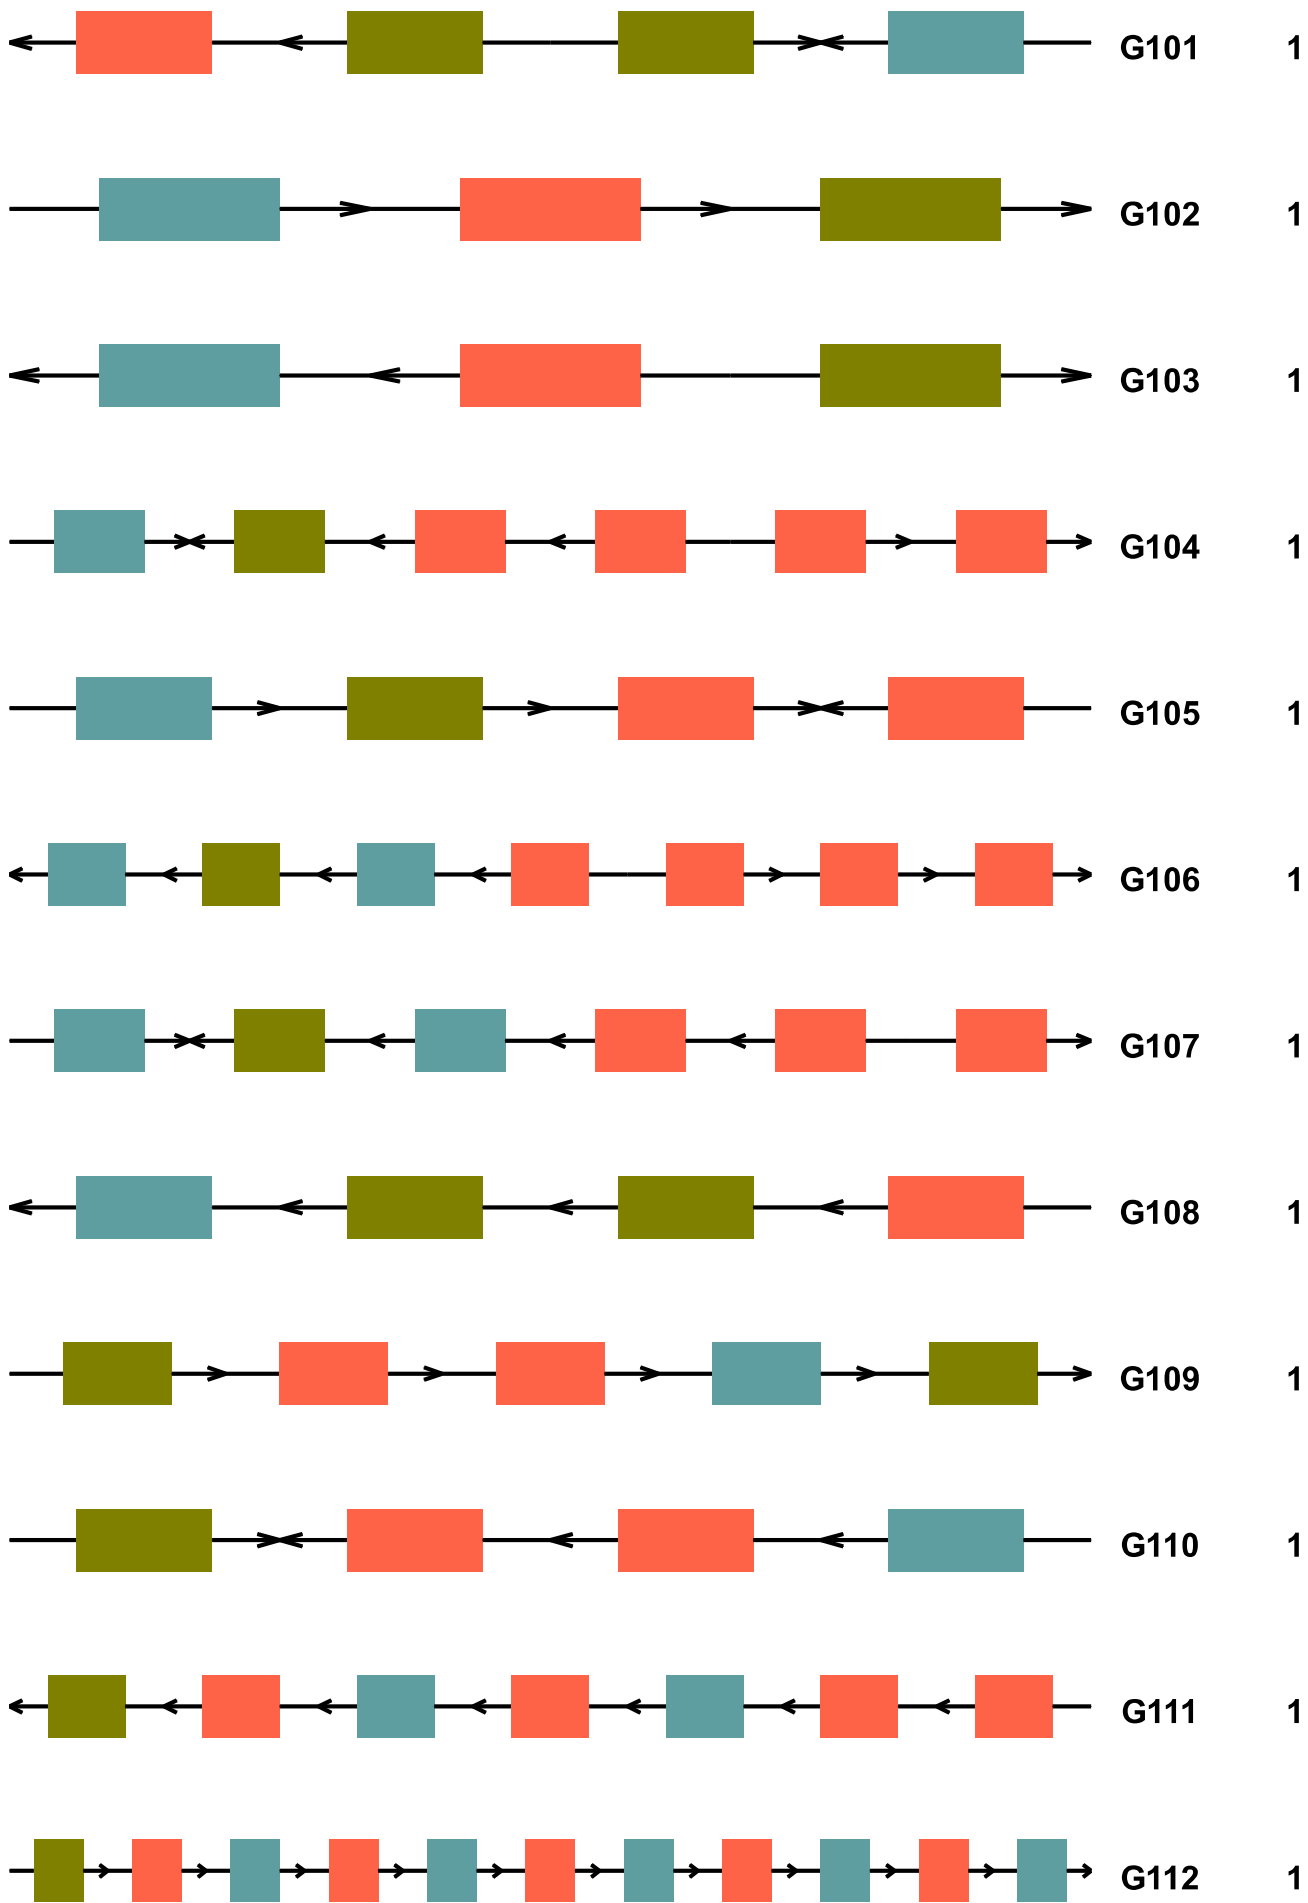

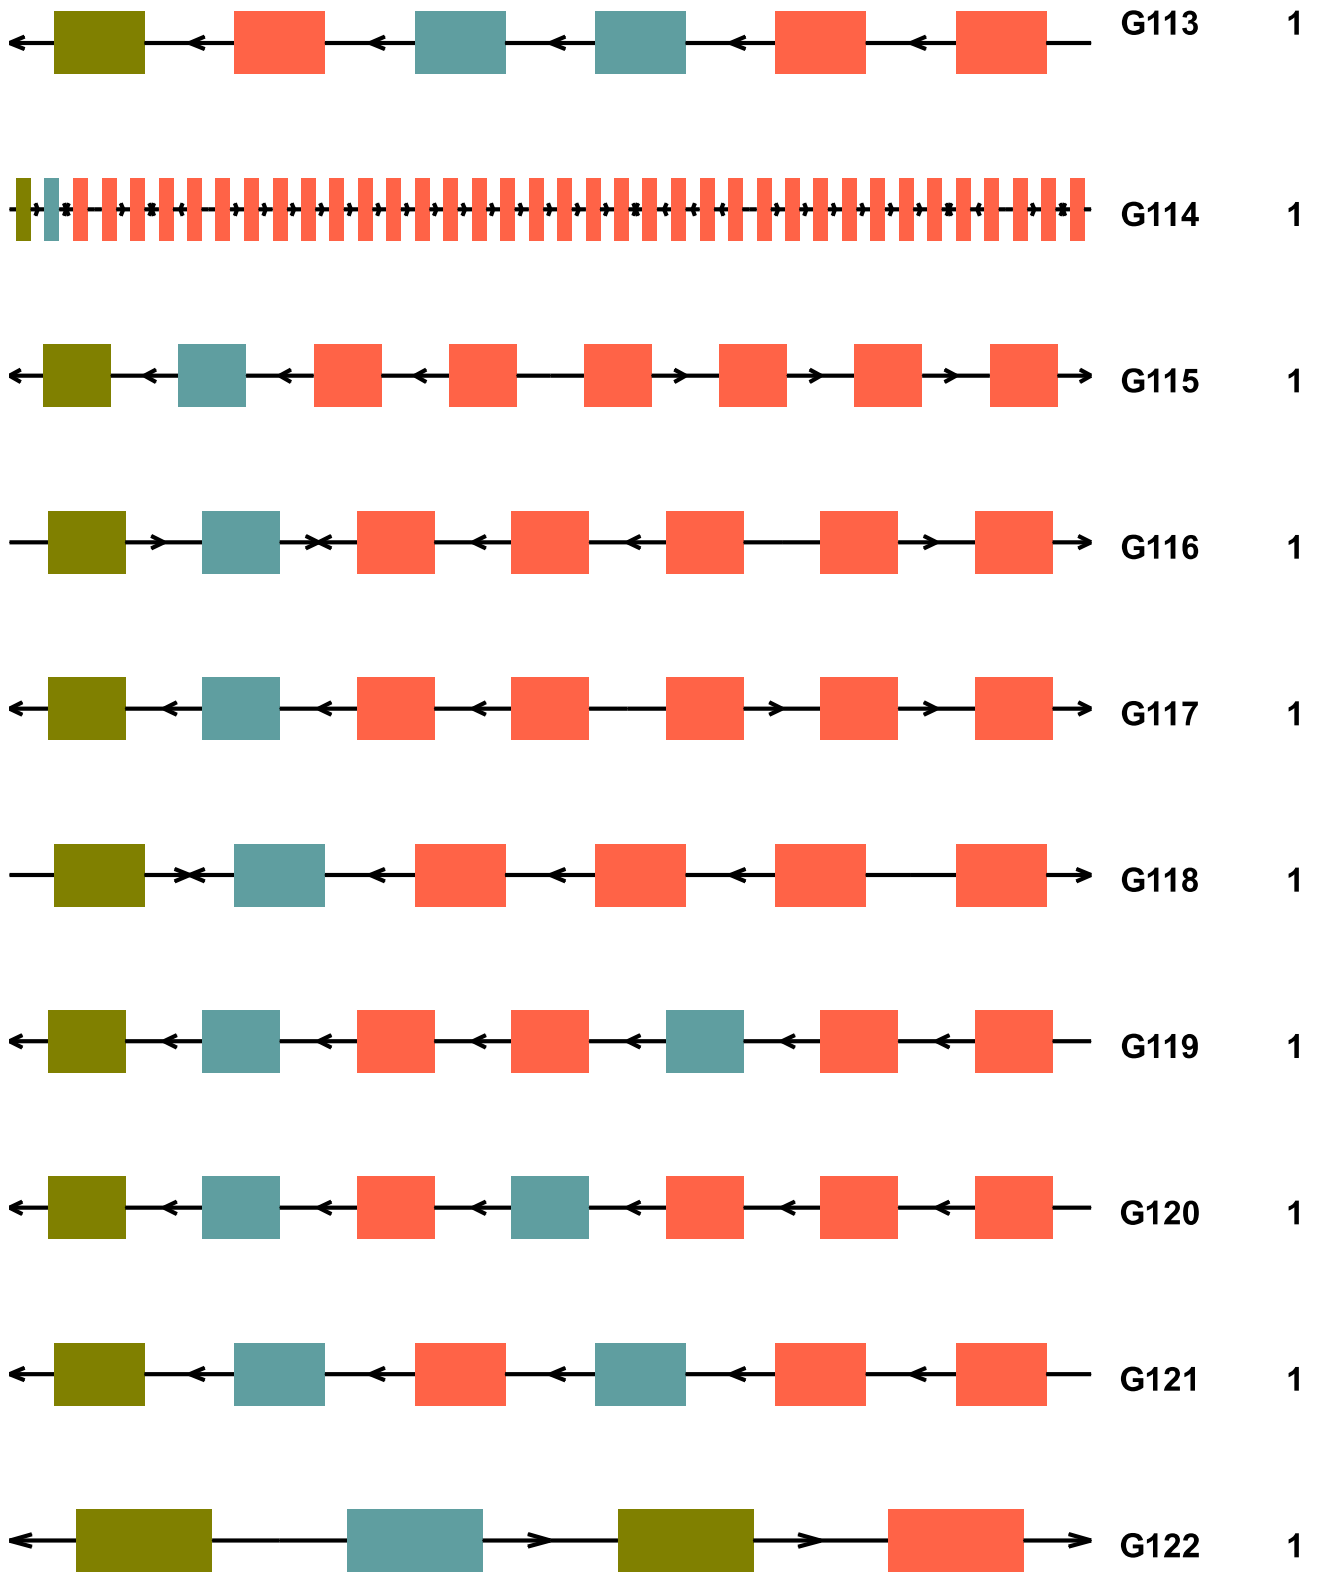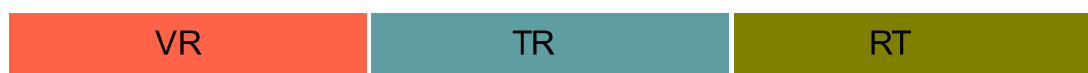

Supplement: 12864_2019_5951_MOESM18_ESM.pdf [file 12864_2019_5951_MOESM18_ESM.pdf]
